# Supplementary material for: Modifying a charge density wave transition by modulation doping: ferecrystalline compounds ([Sn1−xBixSe]1.15)1(VSe2)1 with 0 ≤ x ≤ 0.66
Source: Royal Society of Chemistry journal article supplement (doi:10.1039/c5tc03130c), 2015-01-01
Supplement: c5tc03130c1.pdf [file c5tc03130c1.pdf]

Supplementary information for the article “Modifying a charge density wave transition by modulation doping: ferecrystalline compounds  $([\text{Sn}_{1-x}\text{Bi}_x\text{Se}]_{1.15})_1(\text{VSe}_2)_1$  with  $0 \leq x \leq 0.66$  by M. Falmbigl, Z. Hay, J. Ditto, G. Mitchson, and D. C. Johnson.

**Table S1** Rietveld refinement results for the ferecrystalline compounds  $([\text{Sn}_{1-x}\text{Bi}_x\text{Se}]_{1.15})_1(\text{VSe}_2)_1$  with  $x = 0.06, 0.23, 0.42,$  and  $0.57$ . Space group:  $P3m1$ .

| Parameter/Compound                                                    | x = 0.06                                                                 | x = 0.23                                                                 | x = 0.42                                                                 | x = 0.57                                                                 |
|-----------------------------------------------------------------------|--------------------------------------------------------------------------|--------------------------------------------------------------------------|--------------------------------------------------------------------------|--------------------------------------------------------------------------|
| Composition from refinement                                           | $([\text{Sn}_{0.94}\text{Bi}_{0.06}\text{Se}]_{1.07})_1(\text{VSe}_2)_1$ | $([\text{Sn}_{0.85}\text{Bi}_{0.15}\text{Se}]_{1.10})_1(\text{VSe}_2)_1$ | $([\text{Sn}_{0.60}\text{Bi}_{0.40}\text{Se}]_{1.08})_1(\text{VSe}_2)_1$ | $([\text{Sn}_{0.43}\text{Bi}_{0.57}\text{Se}]_{1.05})_1(\text{VSe}_2)_1$ |
| Composition from EPMA                                                 | $([\text{Sn}_{0.94}\text{Bi}_{0.06}\text{Se}]_{1.2})_1(\text{VSe}_2)_1$  | $([\text{Sn}_{0.77}\text{Bi}_{0.23}\text{Se}]_{1.12})_1(\text{VSe}_2)_1$ | $([\text{Sn}_{0.58}\text{Bi}_{0.42}\text{Se}]_{1.26})_1(\text{VSe}_2)_1$ | $([\text{Sn}_{0.43}\text{Bi}_{0.57}\text{Se}]_{1.23})_1(\text{VSe}_2)_1$ |
| Radiation                                                             | Bruker D8, Cu $K_\alpha$                                                 |
| $2\theta$ range (degrees)                                             | $6 \leq 2\theta \leq 65$                                                 |
| c (nm)                                                                | 1.20056(6)                                                               | 1.19421(3)                                                               | 1.18895(3)                                                               | 1.18865(4)                                                               |
| Reflections in refinement                                             | 8                                                                        | 8                                                                        | 8                                                                        | 8                                                                        |
| Number of variables                                                   | 12                                                                       | 12                                                                       | 12                                                                       | 11                                                                       |
| $R_F = \sum  F_o - F_c  / \sum F_o$                                   | 0.0301                                                                   | 0.0263                                                                   | 0.0519                                                                   | 0.0394                                                                   |
| $R_I = \sum  I_o - I_c  / \sum I_o$                                   | 0.0612                                                                   | 0.0242                                                                   | 0.0243                                                                   | 0.0205                                                                   |
| $R_{wP} = [\sum w_i  y_{oi} - y_{ci} ^2 / \sum w_i  y_{oi} ^2]^{1/2}$ | 0.165                                                                    | 0.0817                                                                   | 0.0684                                                                   | 0.0997                                                                   |
| $R_p = \sum  y_{oi} - y_{ci}  / \sum  y_{oi} $                        | 0.116                                                                    | 0.0514                                                                   | 0.0420                                                                   | 0.0681                                                                   |
| $R_e = [(N - P + C) / (\sum w_i y_{oi}^2)]^{1/2}$                     | 0.0166                                                                   | 0.0125                                                                   | 0.0177                                                                   | 0.0197                                                                   |
| $\chi^2 = (R_{wP} / R_e)^2$                                           | 98.7                                                                     | 45.5                                                                     | 16.4                                                                     | 36.3                                                                     |
| <b>Atom parameters</b>                                                |                                                                          |                                                                          |                                                                          |                                                                          |
| V in $1a(0)$                                                          |                                                                          |                                                                          |                                                                          |                                                                          |
| Occ.                                                                  | 1.0                                                                      | 1.0                                                                      | 1.0                                                                      | 1.0                                                                      |
| Se1 in $2c(z), z$                                                     | 0.1299(1)                                                                | 0.1288(1)                                                                | 0.1265(1)                                                                | 0.1261(1)                                                                |
| Occ.                                                                  | 1.0                                                                      | 1.0                                                                      | 1.0                                                                      | 1.0                                                                      |
| Sn/Bi in $2c(z), z$                                                   | 0.3709(2)                                                                | 0.3740(3)                                                                | 0.376(1)                                                                 | 0.3757(1)                                                                |
| Occ.                                                                  | Sn1.01(2)/Bi0.06                                                         | Sn0.94(3)/Bi0.16                                                         | Sn0.65(4)/Bi0.43                                                         | Sn0.45(4)/Bi0.60                                                         |
| Se2 in $2c(z), z$                                                     | 0.4003(4)                                                                | 0.3891(5)                                                                | 0.380(2)                                                                 | 0.3757(1)                                                                |
| Occ.                                                                  | 1.07(2)                                                                  | 1.10(3)                                                                  | 1.08(4)                                                                  | 1.05(4)                                                                  |

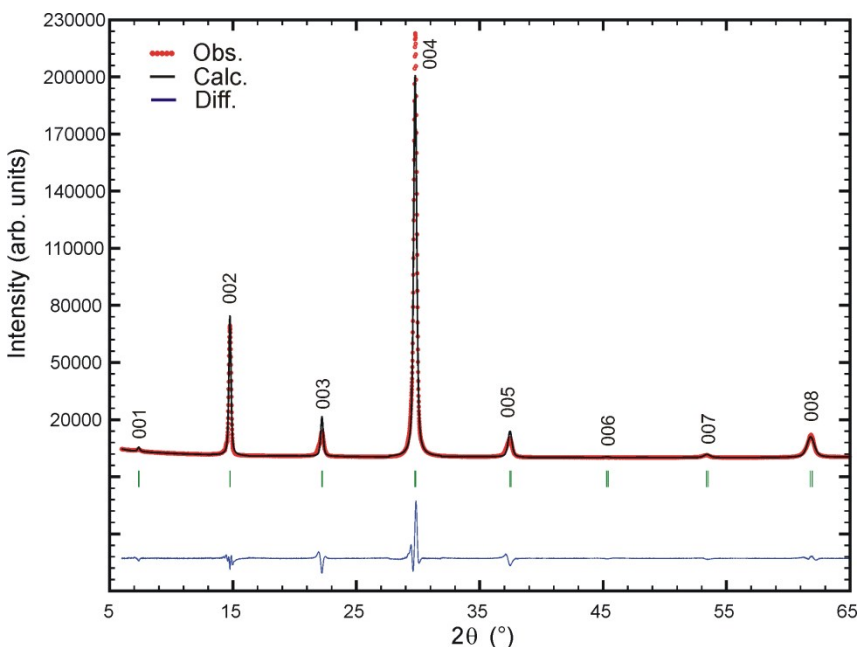

**Fig. S1** Rietveld refinement results for the ferecrystalline compound  $([\text{Sn}_{0.94}\text{Bi}_{0.06}\text{Se}]_{1+\delta})_1(\text{VSe}_2)_1$ .

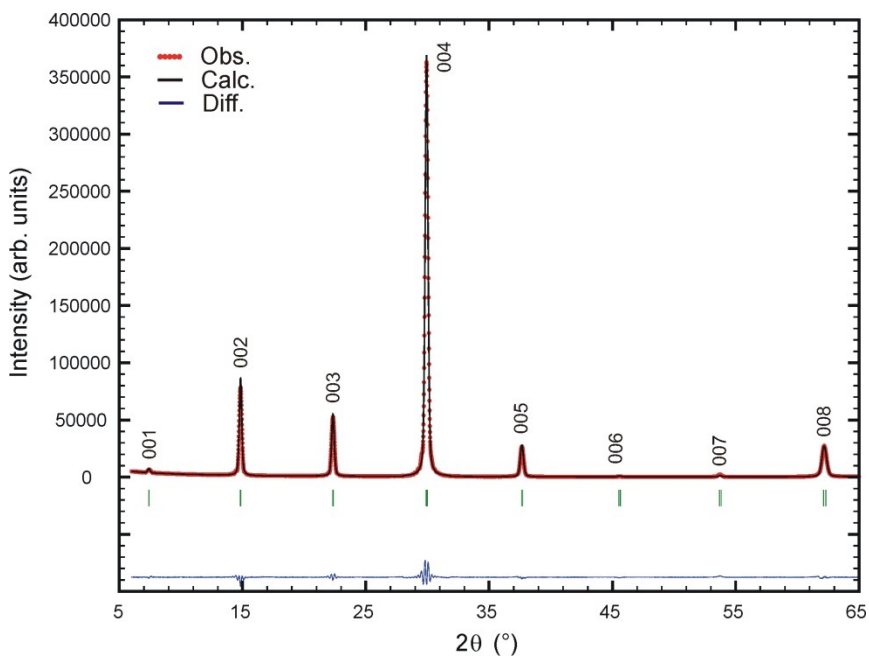

**Fig. S2** Rietveld refinement results for the ferecrystalline compound  $([\text{Sn}_{0.77}\text{Bi}_{0.23}\text{Se}]_{1+\delta})_1(\text{VSe}_2)_1$ .

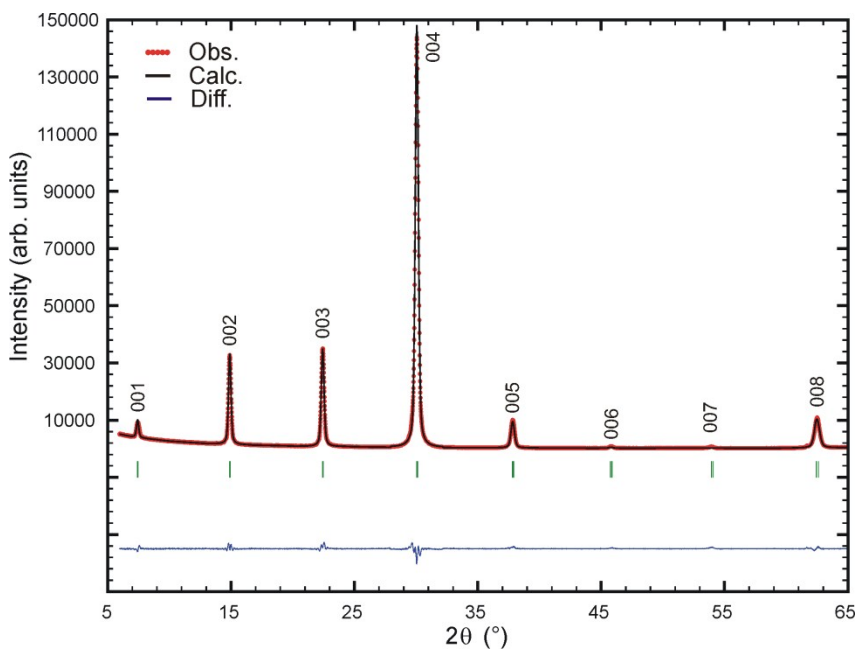

**Fig. S3** Rietveld refinement results for the ferecrystalline compound  $([\text{Sn}_{0.58}\text{Bi}_{0.42}\text{Se}]_{1+\delta})_1(\text{VSe}_2)_1$ .

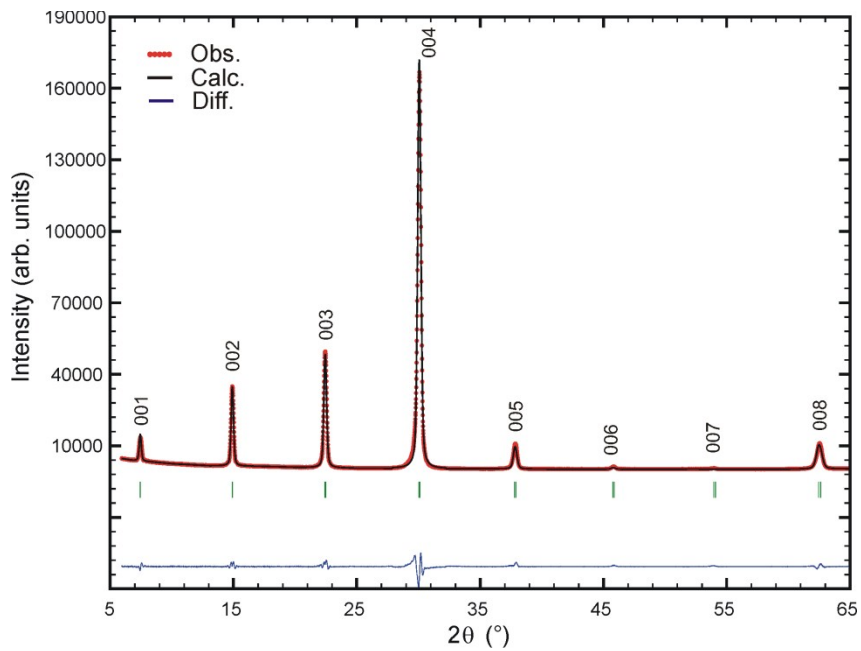

**Fig. S4** Rietveld refinement results for the ferrocristalline compound  $([\text{Sn}_{0.43}\text{Bi}_{0.57}\text{Se}]_{1+\delta})_1(\text{VSe}_2)_1$ .

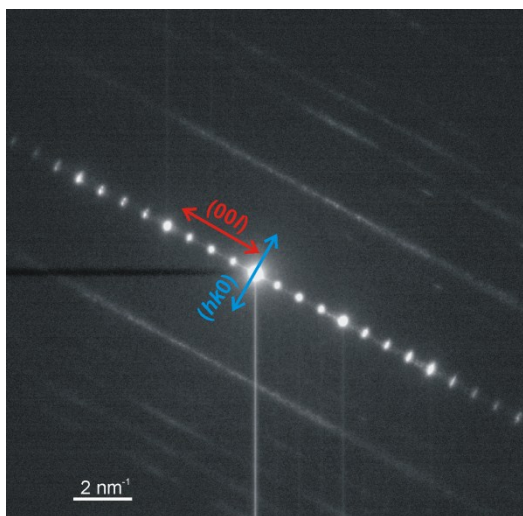

**Fig. S5** Electron diffraction of the ferrocristalline compound  $([\text{Sn}_{0.43}\text{Bi}_{0.57}\text{Se}]_{1+\delta})_1(\text{VSe}_2)_1$ .
